# Supplementary material
Source: PubMed Central journal article supplement (PMC7297205)
Supplement: NIHMS1588232-supplement-Supplementary_Material.pdf [file NIHMS1588232-supplement-Supplementary_Material.pdf]

## Supplementary Material

Clinical and molecular characteristics of gliosarcoma and modern prognostic significance relative to conventional glioblastoma (*J. Neurooncol.* 2017)

Authors: Deborah R. Smith, Cheng-Chia Wu, Heva J. Saadatmand, Steven R. Isaacson, Simon K. Cheng, Michael B. Sisti, Jeffrey N. Bruce, Sameer A. Sheth, Andrew B. Lassman, Fabio M. Iwamoto, Shih-Hsiu Wang, Peter Canoll, Guy M. McKhann 2nd and Tony J. C. Wang

Corresponding author: Dr. Tony J.C. Wang, Department of Radiation Oncology, Columbia University Medical Center, New York, NY, 10032, USA. Electronic address: [tjw2117@cumc.columbia.edu](mailto:tjw2117@cumc.columbia.edu).

**Supplementary Table 1** | Univariate and Multivariate Cox Regression Analysis of Overall Survival Among Primary Gliosarcomas

| Factors                                     | Univariate Analysis: Primary GSM Overall Survival |         | Multivariate Analysis: Primary GSM Overall Survival |         |
|---------------------------------------------|---------------------------------------------------|---------|-----------------------------------------------------|---------|
|                                             | Hazard Ratio (95% CI)                             | P-value | Hazard Ratio (95% CI)                               | P-value |
| <b>Demographics</b>                         |                                                   |         |                                                     |         |
| Age at Diagnosis                            | 1.003 (0.964-1.043)                               | 0.885   |                                                     |         |
| KPS (Karnofsky Performance Status)          | 0.952 (0.853-1.062)                               | 0.377   |                                                     |         |
| RTOG RPA Class                              |                                                   | 0.230   |                                                     | 0.675   |
| III                                         | -                                                 |         | -                                                   |         |
| IV                                          | Reference                                         |         | Reference                                           |         |
| V/VI                                        | 5.477 (0.342-87.820)                              |         | 2.508 (0.034-185.2)                                 |         |
| Gender                                      |                                                   | 0.798   |                                                     |         |
| Female                                      | Reference                                         |         |                                                     |         |
| Male                                        | 1.128 (0.447-2.847)                               |         |                                                     |         |
| Ethnicity                                   |                                                   | 0.697   |                                                     |         |
| Caucasian                                   | Reference                                         |         |                                                     |         |
| Hispanic                                    | 0.773 (0.211-2.833)                               |         |                                                     |         |
| African-American                            | -                                                 |         |                                                     |         |
| Asian                                       | -                                                 |         |                                                     |         |
| <b>Treatment Characteristics</b>            |                                                   |         |                                                     |         |
| Surgical EoR                                |                                                   | 0.025   |                                                     |         |
| Gross total resection                       | Reference                                         |         | Reference                                           | 0.741   |
| Near-total resection/<br>Subtotal resection | 3.574 (1.177-10.851)                              |         | 1.601 (0.098-26.213)                                |         |
| Biopsy                                      | -                                                 |         |                                                     |         |
| Adjuvant Radiotherapy                       |                                                   | 0.259   |                                                     |         |
| No                                          | Reference                                         |         |                                                     |         |
| Yes                                         | 0.479 (0.133-1.721)                               |         |                                                     |         |
| RT Dose, Gy                                 |                                                   | 0.253   |                                                     | 0.808   |
| 59.4-60 Gy                                  | Reference                                         |         | Reference                                           |         |
| <59.4 Gy                                    | 2.609 (0.504-13.518)                              |         | 1.414 (0.086-23.123)                                |         |
| Temozolomide                                |                                                   |         |                                                     |         |
| Yes                                         | 0.630 (0.232-1.713)                               | 0.366   |                                                     |         |
| No                                          | Reference                                         |         |                                                     |         |
| Reresection                                 |                                                   |         |                                                     |         |
| Yes                                         | 0.999 (0.388-2.570)                               | 0.998   |                                                     |         |
| No                                          | Reference                                         |         |                                                     |         |

**Supplementary Table 2** | Comparison of Baseline Patient Characteristics for Primary Gliosarcoma and Glioblastoma

| <b>Patient Characteristics</b>   | <b>Primary Glioblastoma</b> | <b>Primary Gliosarcoma</b> | <b>P-value</b> |
|----------------------------------|-----------------------------|----------------------------|----------------|
| <b>Baseline Demographics</b>     | 451 patients                | 22 patients                |                |
| Median Age, years (range)        | 60.0 (18-91)                | 62 (33-77)                 | 0.630          |
| <50                              | 22.6%                       | 27.3%                      |                |
| ≥50-≤70                          | 42.1%                       | 31.8%                      |                |
| <70                              | 35.3%                       | 40.9%                      |                |
| Median KPS (range)               | 80% (30-100%)               | 80% (60-90%)               |                |
| RTOG RPA Class                   |                             |                            | 0.364          |
| III                              | 10.0%                       | -                          |                |
| IV                               | 60.0%                       | 85.7%                      |                |
| V/VI                             | 29.9%                       | 14.3%                      |                |
| Gender                           |                             |                            | 0.380          |
| Male                             | 57.2%                       | 68.2%                      |                |
| Female                           | 42.6%                       | 31.8%                      |                |
| Ethnicity                        |                             |                            | 0.740          |
| Caucasian                        | 74.3%                       | 83.3%                      |                |
| Hispanic                         | 15.9%                       | 16.7%                      |                |
| African-American                 | 3.7%                        | -                          |                |
| Asian                            | 1.4%                        | -                          |                |
| <b>Treatment Characteristics</b> |                             |                            |                |
| Extent of Resection              |                             |                            | 0.089          |
| Cytoreductive (GTR/NTR/STR)      | 88.0%                       | 100%                       |                |
| Stereotactic biopsy              | 12.0%                       | -                          |                |
| Adjuvant Radiotherapy            |                             |                            | 0.008          |
| Yes                              | 94.7%                       | 77.3%                      |                |
| No                               | 5.3%                        | 22.7%                      |                |
| Median RT Dose, Gy (IQR)         | 60 (59.4-60)                | 59.4 (40.5-60)             | 0.072          |
| 59.4-60 Gy                       | 81.4%                       | 55.6%                      |                |
| <59.4 Gy                         | 18.6%                       | 44.4%                      |                |
| Temozolomide                     |                             |                            | 0.661          |
| Yes                              | 57.0%                       | 63.6%                      |                |
| No                               | 43.0%                       | 36.4%                      |                |

**Supplementary Table 3** | Comparison of Baseline Patient Characteristics for Primary Gliosarcoma and Glioblastoma Among Patients who Received Temozolomide-Based Chemoradiotherapy

| <b>Patient Characteristics</b>   | <b>Primary Glioblastoma</b> | <b>Primary Gliosarcoma</b> | <b>P-value</b> |
|----------------------------------|-----------------------------|----------------------------|----------------|
| <b>Baseline Demographics</b>     | 451 patients                | 14 patients                |                |
| Median Age, years (range)        | 60.0 (18-90)                | 59.5 (40-72)               | 0.657          |
| <50                              | 19.9%                       | 28.6%                      |                |
| ≥50-≤70                          | 46.5%                       | 35.7%                      |                |
| <70                              | 33.6%                       | 35.7%                      |                |
| Median KPS (range)               | 80% (30-100%)               | 80% (60-90%)               |                |
| <b>RTOG RPA Class</b>            |                             |                            | 0.752          |
| III                              | 7.1%                        | -                          |                |
| IV                               | 66.4%                       | 80.0%                      |                |
| V/VI                             | 26.5%                       | 20.0%                      |                |
| <b>Gender</b>                    |                             |                            | 0.409          |
| Male                             | 57.8%                       | 71.4%                      |                |
| Female                           | 42.2%                       | 28.6%                      |                |
| <b>Ethnicity</b>                 |                             |                            | 0.873          |
| Caucasian                        | 72.1%                       | 81.8%                      |                |
| Hispanic                         | 17.9%                       | 18.2%                      |                |
| African-American                 | 4.8%                        | -                          |                |
| Asian                            | 4.4%                        | -                          |                |
| <b>Treatment Characteristics</b> |                             |                            |                |
| <b>Extent of Resection</b>       |                             |                            | 0.611          |
| Cytoreductive (GTR/NTR/STR)      | 88.0%                       | 100.0%                     |                |
| Stereotactic biopsy              | 12.0%                       | -                          |                |
| <b>Median RT Dose, Gy (IQR)</b>  | 60 (60-60)                  | 52.5 (40.05-60)            | 0.043          |
| 59.4-60 Gy                       | 82.3%                       | 50%                        |                |
| <59.4 Gy                         | 17.7%                       | 50%                        |                |
